# Supplementary material for: Four Novel Botourmiaviruses Co-Infecting an Isolate of the Rice Blast Fungus Magnaporthe oryzae
Source: PubMed Central journal article supplement (PMC7761653; doi:10.3390/v12121383), 2020-12-03
Supplement: viruses-12-01383-s001.pdf [file viruses-12-01383-s001.pdf]

Supplementary TableS1 The primers used in the experiment

| Primer name | Sequences (5' to 3') |
|-------------|----------------------|
| MOBV5-F1    | GCGAGGAAGAGTGTATCGCT |
| MOBV5-F2    | TGCTCGGGAAACAGGATTGT |
| MOBV5-R1    | TAAGGCGATGGCTCTGTGAG |
| MOBV5-R2    | CCTGAACGACATTTCTGCCG |
| MOBV6-F1    | ACTTCCCTCCTCGCAAATC  |
| MOBV6-F2    | CCTCCTCGCAAATCCAGAA  |
| MOBV6-R1    | GGTCAACGAGTGGGATTACC |
| MOBV6-R2    | GCTTAGTCTTCCGCCTTCTC |
| MOBV7-F1    | GTGTCGACGACGGAGATGAT |
| MOBV7-F2    | TGTGAGCTGTGTTCTCGTGT |
| MOBV7-R1    | ACGTAACCTCCTCTGGGTCT |
| MOBV7-R2    | CTTTGGAACCGAAGCCAGTG |
| PC2         | CCGAATTCCC GGGATCC   |
